# Supplementary material for: The Relationship between Fungal Diversity and Invasibility of a Foliar Niche—The Case of Ash Dieback
Source: PubMed Central journal article supplement (PMC7558441; doi:10.3390/jof6030150), 2020-08-26
Supplement: jof-06-00150-s001.pdf [file jof-06-00150-s001.pdf]

## Supplementary material

Table S1. Abundance, growth form in vegetative phase and hypothetical functional group of fungal species detected on leaflets of *Fraxinus excelsior* and *Sorbus aucuparia*. For growth form, F indicates filamentous, Y, yeast and D dimorphic. For the hypothetical functional group, En indicates endophytic, Ep epiphytic, B biotrophic, M mycoparasitic, N necrotrophic and S saprotrophic

| Growth form | Hypothetical Functional group | Species                           | UNITE species hypotheses | No of sequences on ash/rowan | % of ash/rowan sequences |
|-------------|-------------------------------|-----------------------------------|--------------------------|------------------------------|--------------------------|
| F           | N                             | <i>Venturia fraxini</i>           | SH131889.07FU            | 2136/196                     | 23.70/8.0                |
| F           | N                             | <i>Hymenoscyphus fraxineus</i>    | SH106453.07FU            | 936/52                       | 10.39/2.12               |
| Y           | Ep/En                         | <i>Vishniacozyma victoriae</i>    | SH085564.07FU            | 743/335                      | 8.25/13.67               |
| Y           | Ep/En                         | <i>Dioszegia sp</i>               |                          | 736/52                       | 8.17/2.12                |
| F           | B                             | <i>Phyllactinia fraxini</i>       | SH111028.07FU            | 613/9                        | 6.80/0.37                |
| D           | Ep/En                         | <i>Aureobasidium pullullans</i>   | SH103321.07FU            | 465/204                      | 5.16/8.32                |
| Y           | Ep/En                         | <i>Vishniacozyma heimaeyensis</i> | SH085568.07FU            | 385/97                       | 4.27/3.96                |
| Y           | Ep/En                         | <i>Vishniacozyma carnescens</i>   | SH1159265.08FU           | 382/44                       | 4.24/1.8                 |
| F           |                               | <i>Cladosporium ramotenellum</i>  | SH129886.07FU            | 314/162                      | 3.48/6.61                |
| D           | B                             | <i>Taphrina carpini</i>           | SH100611.07FU            | 302/119                      | 3.35/4.86                |
| Y           | Ep/En                         | <i>Vishniacozyma foliicola</i>    | SH085570.07FU            | 263/22                       | 2.92/0.9                 |
| Y           | Ep/En                         | <i>Filobasidium wieringae</i>     | SH134145.07FU            | 134/132                      | 1.49/5.39                |
| D           | B                             | <i>Taphrina padi</i>              | SH1153419.08FU           | 129/82                       | 1.43/3.35                |
| Y           | Ep/En                         | <i>Dioszegia aurantica</i>        | SH116917.07FU            | 92/46                        | 1.02/1.88                |
| Y           | Ep/En                         | <i>Papilioderma flavescens</i>    | SH113230.07FU            | 89/48                        | 0.99/1.96                |
| D           | B                             | <i>Taphrina sp.</i>               |                          | 54/18                        | 0.60/0.73                |
| F           | N                             | <i>Botrytis cinerea</i>           | SH1189120.08FU           | 51/104                       | 0.57/4.24                |
| F           | B                             | <i>Exobasidium gracile</i>        | SH116261.07FU            | 40/3                         | 0.44/0.12                |
| Y           | Ep/En                         | <i>Sporobolomyces ruberrimus</i>  | SH102276.07FU            | 39/5                         | 0.43/0.20                |
| F           |                               | <i>Septoria sp.</i>               |                          | 35/10                        | 0.39/0.41                |
| D           |                               | <i>Tilletiopsis sp.</i>           |                          | 30/10                        | 0.33/0.41                |
| Y           | Ep/En                         | <i>Hannaella coprosmae</i>        | SH1155517.08FU           | 30/3                         | 0.33/0.12                |
| F           | M                             | <i>Angustimassarina rosarum</i>   | SH1182782.08FU           | 29/39                        | 0.32/1.59                |
| Y           | Ep/En                         | <i>Vishniacozyma dimennae</i>     | SH112907.07FU            | 28/7                         | 0.31/0.29                |
| Y           | Ep/En                         | <i>Dioszegia fristingensis</i>    | SH120007.07FU            | 25/8                         | 0.28/0.33                |
| F           | N                             | <i>Didymella sp.</i>              |                          | 24/8                         | 0.27/0.33                |
| ?           | B                             | <i>Microstroma juglandis</i>      | SH092670.07FU            | 24/1                         | 0.27/0.04                |
| F           | En                            | <i>Dothiora pyrenophora</i>       | SH1149665.08FU           | 23/21                        | 0.26/0.86                |
| F           | S                             | <i>Russula vitellina</i>          | SH090222.07FU            | 22/0                         | 0.24/0                   |
| F           |                               | <i>Leptosphaeria rubefaciens</i>  | SH124988.07FU            | 19/2                         | 0.21/0.08                |

| Growth form | Hypothetical Functional group | Species                                  | UNITE species hypotheses | No of sequences on ash/rowan | % of ash/rowan sequences |
|-------------|-------------------------------|------------------------------------------|--------------------------|------------------------------|--------------------------|
| Y           | Ep/En                         | <i>Dioszegia sp.</i>                     |                          | 18/0                         | 0.20/0                   |
|             |                               | <i>Ascomycota sp.</i>                    |                          | 17/1                         | 0.19/0.04                |
|             |                               | <i>Helotiales sp.</i>                    |                          | 17/0                         | 0.19/0                   |
| F           |                               | <i>Phaeosphaeria sp.</i>                 |                          | 16/13                        | 0.18/0.53                |
| F           | N                             | <i>Alternaria infectoria</i>             | SH128560.07FU            | 16/5                         | 0.18/0.20                |
| F           | N                             | <i>Ramularia rumicicola</i>              | SH1194043.08FU           | 16/3                         | 0.18/0.12                |
| F           |                               | <i>Xenoramularia neerlandica</i>         | SH1194047.08FU           | 15/1                         | 0.17/0.04                |
| Y           | Ep/En                         | <i>Dioszegia butyracea</i>               | SH120009.07FU            | 15/3                         | 0.17/0.12                |
| F           |                               | <i>Naevula minutissima</i>               | SH089113.07FU            | 14/4                         | 0.16/0.16                |
| F           | N                             | <i>Ramularia cynarae</i>                 | SH1194043.08FU           | 13/10                        | 0.14/0.41                |
|             |                               | <i>Cadophora sp.</i>                     |                          | 13/4                         | 0.14/0.16                |
| F           | N                             | <i>Fusarium tricinctum</i>               | SH131965.07FU            | 12/9                         | 0.13/0.37                |
| F           |                               | <i>Sclerostagonospora sp.</i>            | SH1157054.08FU           | 12/4                         | 0.13/0.16                |
|             |                               | <i>Ascomycota sp.</i>                    |                          | 11/4                         | 0.12/0.16                |
| Y           | Ep/En                         | <i>Vihniacozyma globospora</i>           | SH112906.07FU            | 10/13                        | 0.11/0.53                |
| Y           |                               | <i>Knufia sp</i>                         |                          | 10/2                         | 0.11/0.08                |
| F           | S                             | <i>Neosetophoma rosigena</i>             | SH1157057.08FU           | 9/9                          | 0.10/0.37                |
| Y           | Ep/En                         | <i>Vishniacozyma foliicola</i>           | SH1159266.08FU           | 9/0                          | 0.10/0                   |
| F           | B                             | <i>Pucciniastrum areolatum</i>           | SH1227098.08FU           | 9/7                          | 0.10/0.29                |
| Y           | EP/En                         | <i>Itersonia pannonica</i>               | SH107249.07FU            | 9/1                          | 0.10/0.04                |
| Y           | Ep/En                         | <i>Sporobolomyces roseus</i>             | SH1192588.08FU           | 9/0                          | 0.10/0                   |
| F           |                               | <i>Ramularia hydrangeae-macrophyllae</i> | SH116484.07FU            | 8/6                          | 0.09/0.24                |
| F           | B                             | <i>Exobasidium sp</i>                    |                          | 8/4                          | 0.09/0.16                |
| Y           |                               | <i>Cryptococcus flavescens</i>           | SH114390.07FU            | 8/4                          | 0.09/0.16                |
| Y           | Ep/En                         | <i>Bulleribasidium variabile</i>         | SH135101.07FU            | 8/3                          | 0.09/0.12                |
|             |                               | <i>Basidiomycota sp.</i>                 |                          | 7/31                         | 0.08/1.26                |
| F           | N                             | <i>Davidiella tassiana</i>               | SH1190878.08FU           | 7/4                          | 0.08/0.16                |
| Y           | Ep/En                         | <i>Bullera alba</i>                      | SH126915.07FU            | 7/4                          | 0.08/0.16                |
| F           |                               | <i>Dothiora sp.</i>                      |                          | 7/1                          | 0.08/0.04                |
| F           | N                             | <i>Venturia fraxini</i>                  | SH131889.07FU            | 6/0                          | 0.07/0                   |
| F           |                               | <i>Pleosporales sp.</i>                  |                          | 6/0                          | 0.07/0                   |
|             |                               | <i>Ascomycota sp.</i>                    |                          | 6/0                          | 0.07/0                   |
| F           |                               | <i>Cladosporium sp.</i>                  |                          | 5/0                          | 0.06/0                   |
| F           |                               | <i>Xenoramularia neerlandica</i>         | SH1194047.08FU           | 5/16                         | 0.06/0.65                |
| F           |                               | <i>Loratospora luzulae</i>               | SH1157055.08FU           | 5/2                          | 0.06/0.08                |
| F           | B                             | <i>Melampsora sp.</i>                    |                          | 5/0                          | 0.06/0                   |
| F           | S                             | <i>Trametes versicolor</i>               | SH100234.07FU            | 5/0                          | 0.06/0                   |
|             |                               | <i>Ascomycete sp</i>                     |                          | 4/20                         | 0.04/0.82                |
| F           |                               | <i>Alternaria sp.</i>                    |                          | 4/5                          | 0.04/0.20                |
| Y           | Ep/En                         | <i>Rhodospordiobolus colostri</i>        | SH1181847.08FU           | 4/7                          | 0.04/0.29                |

| Growth form | Hypothetical Functional group | Species                                            | UNITE species hypotheses | No of sequences on ash/rowan | % of ash/rowan sequences |
|-------------|-------------------------------|----------------------------------------------------|--------------------------|------------------------------|--------------------------|
|             |                               | <i>Ascomycota sp.</i>                              |                          | 4/3                          | 0.04/0.12                |
| Y           |                               | <i>Cryptococcus sp.</i>                            |                          | 4/5                          | 0.04/0.20                |
| D           | B                             | <i>Taphrina sadebeckii</i>                         | SH100610.07FU            | 4/1                          | 0.04/0.04                |
| F           | B                             | <i>Thekopsora areolata</i>                         | SH1227098.08FU           | 4/3                          | 0.04/0.12                |
| F           |                               | <i>Pleosporales sp</i>                             |                          | 4/1                          | 0.04/0.04                |
| F           | N                             | <i>Monographella nivalis</i><br><i>var nivalis</i> | SH124583.07FU            | 4/0                          | 0.04/0                   |
| D           | Ep/En                         | <i>Aureobasidium pullulans</i>                     | SH103321.07FU            | 4/0                          | 0.04/0                   |
| F           | B                             | <i>Podosphaera tridactyla</i>                      | SH081935.07FU            | 4/0                          | 0.04/0                   |
| F           |                               | <i>Pleosporales sp</i>                             |                          | 3/10                         | 0.03/0.41                |
| D           |                               | <i>Ophiostoma quercus</i>                          | SH135043.07FU            | 3/2                          | 0.03/0.08                |
| F           | N                             | <i>Colletotrichum acutatum</i>                     | SH117167.07FU            | 3/3                          | 0.03/0.12                |
| Y           | Ep/En                         | <i>Rhodotorula pinicola</i>                        | SH1214242.08FU           | 3/5                          | 0.03/0.20                |
| F           | N                             | <i>Sphaerulina berberidis</i>                      | SH1194042.08FU           | 3/3                          | 0.03/0.12                |
| F           | N                             | <i>Microcyclosporella mali</i>                     | SH1201747.08FU           | 3/0                          | 0.03/0                   |
| Y           |                               | <i>Knufia cryptophialidica</i>                     | SH101062.07FU            | 3/1                          | 0.03/0.04                |
| Y           |                               | <i>Filobasidium sp.</i>                            |                          | 3/0                          | 0.03/0                   |
| F           |                               | <i>Cladosporium sp.</i>                            |                          | 3/3                          | 0.03/0.12                |
|             |                               | <i>Ascomycota sp.</i>                              |                          | 2/3                          | 0.02/0.12                |
| F           |                               | <i>Exophiala sp.</i>                               |                          | 2/4                          | 0.02/0.16                |
| Y           | Ep/En                         | <i>Pseudomicrostroma phylloplanum</i>              | SH1185854.08FU           | 2/3                          | 0.02/0.12                |
| Y           | Ep/En                         | <i>Bulleribasidium variabile</i>                   | SH135101.07FU            | 2/3                          | 0.02/0.12                |
| F           |                               | <i>Tetracladium sp.</i>                            |                          | 2/1                          | 0.02/0.04                |
| F           |                               | <i>Phaeosphaeria sp.</i>                           |                          | 2/4                          | 0.02/0.16                |
| F           | S                             | <i>Peniophora cinerea</i>                          | SH1235335.08FU           | 2/2                          | 0.02/0.08                |
| F           |                               | <i>Sarcinomyces sp.</i>                            |                          | 2/2                          | 0.02/0.08                |
| F           | N                             | <i>Parastagonospora nodorum</i>                    | SH1157054.08FU           | 2/2                          | 0.02/0.08                |
| Y           |                               | <i>Malassezia globosa</i>                          | SH088577.07FU            | 2/1                          | 0.02/0.04                |
| D           | N                             | <i>Ophiostoma novo ulmi</i>                        | SH135046.07FU            | 2/0                          | 0.02/0                   |
| F           | N                             | <i>Gibellulopsis nigrescens</i>                    | SH1234027.08FU           | 2/1                          | 0.02/0.04                |
| F           | N                             | <i>Venturia fraxini</i>                            | SH131889.07FU            | 2/0                          | 0.02/0                   |
| D           | Ep/En                         | <i>Dioszegia takashimae</i>                        | SH086148.07FU            | 2/0                          | 0.02/0                   |
| D           | Ep/En                         | <i>Aureobasidium pullullans</i>                    | SH1149661.08FU           | 2/0                          | 0.02/0                   |
| F           | S                             | <i>Gloeophyllum trabeum</i>                        | SH105175.07FU            | 2/0                          | 0.02/0                   |
| Y           |                               | <i>Cystobasidium sp.</i>                           |                          | 2/0                          | 0.02/0                   |
| F           |                               | <i>Alternaria metachromatic</i>                    | SH1142798.08FU           | 2/0                          | 0.02/0                   |
| F           | B                             | <i>Blumeria graminis</i>                           | SH114813.07FU            | 2/0                          | 0.02/0                   |
| F           |                               | <i>Massarina sp</i>                                |                          | 2/0                          | 0.02/0                   |
| F           | N                             | <i>Phialophora sessilis</i>                        | SH1228270.08FU           | 1/32                         | 0.01/1.31                |
| Y           |                               | <i>Malassezia restricta</i>                        | SH1149886.08FU           | 1/2                          | 0.01/0.08                |

| Growth form | Hypothetical Functional group | Species                          | UNITE species hypotheses | No of sequences on ash/rowan | % of ash/rowan sequences |
|-------------|-------------------------------|----------------------------------|--------------------------|------------------------------|--------------------------|
| F           |                               | <i>Muriformistrickeria rubi</i>  | SH1234973.08FU           | 1/5                          | 0.01/0.20                |
| Y           |                               | <i>Filobasidium sp.</i>          |                          | 1/4                          | 0.01/0.16                |
| F           | En                            | <i>Lophodermium piceae</i>       | SH129503.07FU            | 1/4                          | 0.01/0.16                |
|             |                               | <i>Ascomycota sp.</i>            | SH1222417.08FU           | 1/3                          | 0.01/0.12                |
| F           |                               | <i>Penicillium bialowiezense</i> | SH107620.07FU            | 1/2                          | 0.01/0.08                |
| Y           |                               | <i>Dioszegia rishiriensis</i>    | SH120016.07FU            | 1/2                          | 0.01/0.08                |
|             |                               | <i>Helotiales sp.</i>            |                          | 1/1                          | 0.01/0.04                |
| F           |                               | <i>Fusarium sp.</i>              |                          | 1/0                          | 0.01/0                   |
|             |                               | <i>Ascomycete sp</i>             |                          | 1/0                          | 0.01/0                   |
| Y           |                               | <i>Phyllozoma coprosmicola</i>   | SH085547.07FU            | 1/1                          | 0.01/0.04                |

Table S2. Relative abundance of fungal species present on unwashed and washed leaflets of *Fraxinus excelsior* (a) and *Sorbus aucuparia* (b)

a

| Species                          | Unwashed | Washed | % of unwashed sequences | % of washed sequences |
|----------------------------------|----------|--------|-------------------------|-----------------------|
| <i>Venturia fraxini</i>          | 1067     | 1069   | 20.34                   | 28.41                 |
| <i>Hymenoscyphus fraxineus</i>   | 769      | 167    | 14.66                   | 4.44                  |
| <i>Phyllactinia fraxini</i>      | 387      | 226    | 7.38                    | 6.01                  |
| <i>Dioszegia sp.</i>             | 370      | 366    | 7.05                    | 9.73                  |
| <i>Aureobasidium pullulans</i>   | 321      | 144    | 6.12                    | 3.83                  |
| <i>Cryptococcus victoriae</i>    | 295      | 448    | 5.62                    | 11.91                 |
| <i>Cryptococcus carnescens</i>   | 286      | 152    | 5.45                    | 4.04                  |
| <i>Cryptococcus heimaeyensis</i> | 237      | 131    | 4.52                    | 3.48                  |
| <i>Cladosporium ramotenellum</i> | 219      | 83     | 4.18                    | 2.21                  |
| <i>Taphrina carpini</i>          | 162      | 152    | 3.09                    | 4.04                  |
| <i>Vishniacozyma foliicola</i>   | 158      | 105    | 3.01                    | 2.79                  |
| <i>Taphrina padi</i>             | 82       | 47     | 1.56                    | 1.25                  |
| <i>Cryptococcus wieringae</i>    | 78       | 56     | 1.49                    | 1.49                  |
| <i>Cryptococcus flavescens</i>   | 58       | 31     | 1.11                    | 0.82                  |
| <i>Dioszegia crocea</i>          | 53       | 32     | 1.01                    | 0.85                  |
| <i>Rhodotorula aurantiaca</i>    | 52       | 40     | 0.99                    | 1.06                  |
| <i>Exobasidium gracile</i>       | 41       | 36     | 0.78                    | 0.96                  |
| <i>Taphrina sp.</i>              | 32       | 22     | 0.61                    | 0.58                  |
| <i>Neosetophoma rosigena</i>     | 31       | 20     | 0.59                    | 0.53                  |
| <i>Tremellales sp.</i>           | 24       | 13     | 0.46                    | 0.35                  |
| <i>Symmetrospora coprosmae</i>   | 23       | 17     | 0.44                    | 0.45                  |
| <i>Sporobolomyces ruberrimus</i> | 23       | 16     | 0.44                    | 0.43                  |

| Species                          | Unwashed | Washed | % of unwashed sequences | % of washed sequences |
|----------------------------------|----------|--------|-------------------------|-----------------------|
| <i>Angustimassarina rosarum</i>  | 21       | 8      | 0.40                    | 0.21                  |
| <i>Bullera coprosmae</i>         | 20       | 10     | 0.38                    | 0.27                  |
| <i>Sporobolomyces gracilis</i>   | 18       | 19     | 0.34                    | 0.50                  |
| <i>Tilletiopsis sp.</i>          | 16       | 14     | 0.31                    | 0.37                  |
| <i>Cryptococcus heimaeyensis</i> | 15       | 2      | 0.29                    | 0.05                  |
| <i>Septoria sp.</i>              | 14       | 21     | 0.27                    | 0.56                  |
| <i>Dioszegia fristingensis</i>   | 14       | 11     | 0.27                    | 0.29                  |
| <i>Microstroma juglandis</i>     | 14       | 10     | 0.27                    | 0.27                  |
| <i>Dothiora pyrenophora</i>      | 13       | 10     | 0.25                    | 0.27                  |
| <i>Alternaria infectoria</i>     | 12       | 4      | 0.23                    | 0.11                  |
| <i>Xenoramularia neerlandica</i> | 11       | 4      | 0.21                    | 0.11                  |
| <i>Didymella sp.</i>             | 11       | 13     | 0.21                    | 0.35                  |
| <i>Ramularia rumicicola</i>      | 11       | 5      | 0.21                    | 0.13                  |
| <i>Cryptococcus dimennae</i>     | 10       | 18     | 0.19                    | 0.48                  |
| <i>Cadophora sp.</i>             | 10       | 3      | 0.19                    | 0.08                  |
| <i>Sclerostagonospora sp.</i>    | 10       | 2      | 0.19                    | 0.05                  |
| <i>Phaeosphaeria sp.</i>         | 9        | 7      | 0.17                    | 0.19                  |
| <i>Ramularia cynarae</i>         | 9        | 4      | 0.17                    | 0.11                  |
| <i>Bensingtonia yuccicola</i>    | 9        | 5      | 0.17                    | 0.13                  |
| <i>Helotiales sp.</i>            | 9        | 8      | 0.17                    | 0.21                  |
| <i>Dioszegia butyracea</i>       | 8        | 7      | 0.15                    | 0.19                  |
| <i>Ascomycota sp.2</i>           | 7        | 10     | 0.13                    | 0.27                  |
| <i>Vishniacozyma foliicola2</i>  | 7        | 2      | 0.13                    | 0.05                  |
| <i>Bulleribasidium variable</i>  | 7        | 1      | 0.13                    | 0.03                  |
| <i>Bacidina mendax</i>           | 7        | 1      | 0.13                    | 0.03                  |
| <i>Russula vitellina</i>         | 6        | 16     | 0.11                    | 0.43                  |
| <i>Pucciniastrum areolatum</i>   | 6        | 3      | 0.11                    | 0.08                  |
| <i>Sporobolomyces roseus</i>     | 6        | 3      | 0.11                    | 0.08                  |
| <i>Pleosporales sp.</i>          | 6        | 0      | 0.11                    | 0.00                  |
| <i>Ascomycota sp.5</i>           | 6        | 0      | 0.11                    | 0.00                  |
| <i>Botrytis cinerea</i>          | 5        | 4      | 0.10                    | 0.11                  |
| <i>Naevala minutissima</i>       | 5        | 9      | 0.10                    | 0.24                  |
| <i>Bullera globospora</i>        | 5        | 5      | 0.10                    | 0.13                  |
| <i>Davidiella tassiana</i>       | 5        | 2      | 0.10                    | 0.05                  |
| <i>Knufia sp.</i>                | 5        | 5      | 0.10                    | 0.13                  |
| <i>Exobasidium sp.</i>           | 5        | 3      | 0.10                    | 0.08                  |
| <i>Papilioterma flavecens</i>    | 5        | 3      | 0.10                    | 0.08                  |
| <i>Trametes versicolor</i>       | 5        | 0      | 0.10                    | 0.00                  |
| <i>Basidiomycota sp.</i>         | 4        | 3      | 0.08                    | 0.08                  |
| <i>Dioszegia sp.2</i>            | 4        | 14     | 0.08                    | 0.37                  |
| <i>Alternaria sp.</i>            | 4        | 0      | 0.08                    | 0.00                  |

| Species                                         | Unwashed | Washed | % of unwashed sequences | % of washed sequences |
|-------------------------------------------------|----------|--------|-------------------------|-----------------------|
| <i>Bulleromyces albus</i>                       | 4        | 3      | 0.08                    | 0.08                  |
| <i>Venturia fraxini</i> 2                       | 4        | 2      | 0.08                    | 0.05                  |
| <i>Monographella nivalis</i> var <i>nivalis</i> | 4        | 0      | 0.08                    | 0.00                  |
| <i>Peniophora cinerea</i>                       | 4        | 0      | 0.08                    | 0.00                  |
| <i>Ascomycota</i> sp.                           | 3        | 8      | 0.06                    | 0.21                  |
| <i>Ramularia hydrangeae-macrophyllae</i>        | 3        | 5      | 0.06                    | 0.13                  |
| <i>Rhodosporeidiobolus colostri</i>             | 3        | 1      | 0.06                    | 0.03                  |
| <i>Itersonilia pannonica</i>                    | 3        | 6      | 0.06                    | 0.16                  |
| <i>Ascomycota</i> sp.4                          | 3        | 1      | 0.06                    | 0.03                  |
| <i>Colletotrichum acutatum</i>                  | 3        | 0      | 0.06                    | 0.00                  |
| <i>Xenoramularia neerlandica</i> 2              | 3        | 2      | 0.06                    | 0.05                  |
| <i>Cryptococcus</i> sp.                         | 3        | 1      | 0.06                    | 0.03                  |
| <i>Taphrina sadebeckii</i>                      | 3        | 1      | 0.06                    | 0.03                  |
| <i>Thekopsora areolata</i>                      | 3        | 1      | 0.06                    | 0.03                  |
| <i>Phoma</i> sp.                                | 3        | 0      | 0.06                    | 0.00                  |
| <i>Melampsora</i> sp.                           | 3        | 2      | 0.06                    | 0.05                  |
| <i>Podosphaera tridactyla</i>                   | 3        | 1      | 0.06                    | 0.03                  |
| <i>Ascomycete</i> sp                            | 2        | 2      | 0.04                    | 0.05                  |
| <i>Fusarium tricinctum</i>                      | 2        | 10     | 0.04                    | 0.27                  |
| <i>Ophiostoma quercus</i>                       | 2        | 1      | 0.04                    | 0.03                  |
| <i>Exophiala</i> sp.                            | 2        | 0      | 0.04                    | 0.00                  |
| <i>Loratospora luzulae</i>                      | 2        | 3      | 0.04                    | 0.08                  |
| <i>Pseudomicrostroma phylloplanum</i>           | 2        | 0      | 0.04                    | 0.00                  |
| <i>Tetracladium</i> sp.                         | 2        | 0      | 0.04                    | 0.00                  |
| <i>Aureobasidium pullulans</i> 2                | 2        | 0      | 0.04                    | 0.00                  |
| <i>Knufia cryptophialidica</i>                  | 2        | 1      | 0.04                    | 0.03                  |
| <i>Parastagonospora nodorum</i>                 | 2        | 0      | 0.04                    | 0.00                  |
| <i>Ophiostoma novo ulmi</i>                     | 2        | 0      | 0.04                    | 0.00                  |
| <i>Filobasidium</i> sp.2                        | 2        | 1      | 0.04                    | 0.03                  |
| <i>Cladosporium</i> sp.                         | 2        | 1      | 0.04                    | 0.03                  |
| <i>Aerobasidium pullullans</i> 3                | 2        | 0      | 0.04                    | 0.00                  |
| <i>Blumeria graminis</i>                        | 2        | 0      | 0.04                    | 0.00                  |
| <i>Cystobasidium</i> sp.                        | 2        | 0      | 0.04                    | 0.00                  |
| <i>Phialophora sessilis</i>                     | 1        | 0      | 0.02                    | 0.00                  |
| <i>Pleosporales</i> sp                          | 1        | 2      | 0.02                    | 0.05                  |
| <i>Malassezia restricta</i>                     | 1        | 0      | 0.02                    | 0.00                  |
| <i>Ascomycota</i> sp.3                          | 1        | 1      | 0.02                    | 0.03                  |
| <i>Rhodotorula pinicola</i>                     | 1        | 2      | 0.02                    | 0.05                  |
| <i>Sphaerulina berberidis</i>                   | 1        | 2      | 0.02                    | 0.05                  |

| Species                           | Unwashed | Washed | % of unwashed sequences | % of washed sequences |
|-----------------------------------|----------|--------|-------------------------|-----------------------|
| <i>Bulleribasidium variabile</i>  | 1        | 1      | 0.02                    | 0.03                  |
| <i>Microcyclosporella mali</i>    | 1        | 2      | 0.02                    | 0.05                  |
| <i>Phaeosphaeria sp.2</i>         | 1        | 1      | 0.02                    | 0.03                  |
| <i>Pleosporales sp2</i>           | 1        | 3      | 0.02                    | 0.08                  |
| <i>Lophodermium piceae</i>        | 1        | 0      | 0.02                    | 0.00                  |
| <i>Ascomycota sp.6</i>            | 1        | 0      | 0.02                    | 0.00                  |
| <i>Malassezia globosa</i>         | 1        | 1      | 0.02                    | 0.03                  |
| <i>Venturia fraxini3</i>          | 1        | 1      | 0.02                    | 0.03                  |
| <i>Gibellulopsis nigrescens</i>   | 1        | 0      | 0.02                    | 0.00                  |
| <i>Ascomycete sp2</i>             | 1        | 0      | 0.02                    | 0.00                  |
| <i>Leptosphaeria rubefaciens</i>  | 0        | 19     | 0.00                    | 0.50                  |
| <i>Cladosporium sp..</i>          | 0        | 5      | 0.00                    | 0.13                  |
| <i>Muriformistrickeria rubi</i>   | 0        | 1      | 0.00                    | 0.03                  |
| <i>Heterocephalacria sp.</i>      | 0        | 2      | 0.00                    | 0.05                  |
| <i>Dothiora sp.</i>               | 0        | 7      | 0.00                    | 0.19                  |
| <i>Filobasidium sp.</i>           | 0        | 1      | 0.00                    | 0.03                  |
| <i>Penicillium bialowiezense</i>  | 0        | 2      | 0.00                    | 0.05                  |
| <i>Dioszegia takashimae</i>       | 0        | 2      | 0.00                    | 0.05                  |
| <i>Dioszegia rishiriensis</i>     | 0        | 1      | 0.00                    | 0.03                  |
| <i>Gloeophyllum trabeum</i>       | 0        | 2      | 0.00                    | 0.05                  |
| <i>Graphilbum sp.</i>             | 0        | 1      | 0.00                    | 0.03                  |
| <i>Phyllozoma coprosmicola</i>    | 0        | 2      | 0.00                    | 0.05                  |
| <i>Massarina sp</i>               | 0        | 1      | 0.00                    | 0.03                  |
| <i>Helotiales sp.2</i>            | 0        | 1      | 0.00                    | 0.03                  |
| <i>Alternaria metachromatic</i>   | 0        | 2      | 0.00                    | 0.05                  |
| <i>Metschnikowia sp.</i>          | 0        | 1      | 0.00                    | 0.03                  |
| <i>Cryptococcus heimaeyensis2</i> | 0        | 2      | 0.00                    | 0.05                  |

b

| Species                            | Unwashed | Washed | % of unwashed sequences | % of washed sequences |
|------------------------------------|----------|--------|-------------------------|-----------------------|
| <i>Vishniacozyma victoriae</i>     | 222      | 113    | 17.33                   | 9.67                  |
| <i>Venturia fraxini</i>            | 104      | 92     | 8.12                    | 7.87                  |
| <i>Vishniacozyma carnescens</i>    | 96       | 53     | 7.49                    | 4.53                  |
| <i>Taphrina carpini</i>            | 93       | 69     | 7.26                    | 5.90                  |
| <i>Aureobasidium pullulans</i>     | 91       | 113    | 7.10                    | 9.67                  |
| <i>Vishniacozyma wieringae</i>     | 66       | 66     | 5.15                    | 5.65                  |
| <i>Vishniacozyma heimaeyensis</i>  | 60       | 37     | 4.68                    | 3.17                  |
| <i>Cladosporium ramotenellum</i>   | 54       | 65     | 4.22                    | 5.56                  |
| <i>Taphrina padi</i>               | 48       | 34     | 3.75                    | 2.91                  |
| <i>Papilioderma flavescens</i>     | 26       | 22     | 2.03                    | 1.88                  |
| <i>Rhodotorula aurantiaca</i>      | 26       | 20     | 2.03                    | 1.71                  |
| <i>Neosetophoma rosigena</i>       | 25       | 79     | 1.95                    | 6.76                  |
| <i>Angustimassarina rosarum</i>    | 20       | 19     | 1.56                    | 1.63                  |
| <i>Basidiomycota sp.</i>           | 20       | 11     | 1.56                    | 0.94                  |
| <i>Dioszegia sp.</i>               | 18       | 34     | 1.41                    | 2.91                  |
| <i>Hymenoscyphus fraxineus</i>     | 17       | 35     | 1.33                    | 2.99                  |
| <i>Dioszegia crocea</i>            | 15       | 38     | 1.17                    | 3.25                  |
| <i>Vishniacozyma foliicola</i>     | 14       | 8      | 1.09                    | 0.68                  |
| <i>Dothiora pyrenophora</i>        | 14       | 7      | 1.09                    | 0.60                  |
| <i>Xenoramularia neerlandica</i>   | 11       | 5      | 0.86                    | 0.43                  |
| <i>Tremmellales sp.</i>            | 10       | 11     | 0.78                    | 0.94                  |
| <i>Phialophora sessilis</i>        | 9        | 23     | 0.70                    | 1.97                  |
| <i>Dioszegia sp.2</i>              | 9        | 7      | 0.70                    | 0.60                  |
| <i>Septoria sp.</i>                | 8        | 2      | 0.62                    | 0.17                  |
| <i>Ascomycete sp</i>               | 8        | 12     | 0.62                    | 1.03                  |
| <i>Ramularia cynarae</i>           | 7        | 3      | 0.55                    | 0.26                  |
| <i>Bullera globospora</i>          | 7        | 6      | 0.55                    | 0.51                  |
| <i>Pseudocercospora sp.</i>        | 7        | 10     | 0.55                    | 0.86                  |
| <i>Exobasidium arescens</i>        | 7        | 5      | 0.55                    | 0.43                  |
| <i>Taphrina sp.</i>                | 6        | 12     | 0.47                    | 1.03                  |
| <i>Didymella sp.</i>               | 6        | 2      | 0.47                    | 0.17                  |
| <i>Phaeosphaeria sp.</i>           | 6        | 7      | 0.47                    | 0.60                  |
| <i>Pleosporales sp</i>             | 6        | 4      | 0.47                    | 0.34                  |
| <i>Phyllactinia fraxini</i>        | 5        | 4      | 0.39                    | 0.34                  |
| <i>Botrytis cinerea</i>            | 5        | 4      | 0.39                    | 0.34                  |
| <i>Vishniacozyma dimennae</i>      | 5        | 2      | 0.39                    | 0.17                  |
| <i>Sporobolomyces gracilis</i>     | 4        | 2      | 0.31                    | 0.17                  |
| <i>Exobasidium sp.</i>             | 4        | 0      | 0.31                    | 0.00                  |
| <i>Rhodosporidiobolus colostri</i> | 4        | 3      | 0.31                    | 0.26                  |



| Species                                  | Unwashed | Washed | % of unwashed sequences | % of washed sequences |
|------------------------------------------|----------|--------|-------------------------|-----------------------|
| <i>Podosphaera leucotricha</i>           | 4        | 0      | 0.31                    | 0.00                  |
| <i>Dioszegia fristingensis</i>           | 3        | 5      | 0.23                    | 0.43                  |
| <i>Alternaria infectoria</i>             | 3        | 2      | 0.23                    | 0.17                  |
| <i>Dioszegia butyracea</i>               | 3        | 0      | 0.23                    | 0.00                  |
| <i>Cadophora sp.</i>                     | 3        | 1      | 0.23                    | 0.09                  |
| <i>Fusarium tricinctum</i>               | 3        | 6      | 0.23                    | 0.51                  |
| <i>Davidiella tassiana</i>               | 3        | 1      | 0.23                    | 0.09                  |
| <i>Pucciniastrum areolatum</i>           | 3        | 4      | 0.23                    | 0.34                  |
| <i>Alternaria sp.</i>                    | 3        | 2      | 0.23                    | 0.17                  |
| <i>Muriformistrickeria rubi</i>          | 3        | 2      | 0.23                    | 0.17                  |
| <i>Heterocephalacria sp.</i>             | 3        | 4      | 0.23                    | 0.34                  |
| <i>Vishniacozyma sp.</i>                 | 3        | 2      | 0.23                    | 0.17                  |
| <i>Exophiala sp.</i>                     | 3        | 1      | 0.23                    | 0.09                  |
| <i>Filobasidium sp.</i>                  | 3        | 1      | 0.23                    | 0.09                  |
| <i>Ascomycota sp.6</i>                   | 3        | 0      | 0.23                    | 0.00                  |
| <i>Microcyclospora tardicrescens</i>     | 3        | 0      | 0.23                    | 0.00                  |
| <i>Symmetrospora coprosmae</i>           | 2        | 1      | 0.16                    | 0.09                  |
| <i>Sporobolomyces ruberrimus</i>         | 2        | 3      | 0.16                    | 0.26                  |
| <i>Bullera coprosmae</i>                 | 2        | 1      | 0.16                    | 0.09                  |
| <i>Naevula minutissima</i>               | 2        | 2      | 0.16                    | 0.17                  |
| <i>Bensingtonia yuccicola</i>            | 2        | 1      | 0.16                    | 0.09                  |
| <i>Ramularia hydrangeae-macrophyllae</i> | 2        | 4      | 0.16                    | 0.34                  |
| <i>Knufia sp.</i>                        | 2        | 0      | 0.16                    | 0.00                  |
| <i>Papilioterma flavecens</i>            | 2        | 2      | 0.16                    | 0.17                  |
| <i>Ophiostoma quercus</i>                | 2        | 0      | 0.16                    | 0.00                  |
| <i>Colletotrichum acutatum</i>           | 2        | 1      | 0.16                    | 0.09                  |
| <i>Rhodotorula pinicola</i>              | 2        | 3      | 0.16                    | 0.26                  |
| <i>Pseudomicrostroma phylloplanum</i>    | 2        | 1      | 0.16                    | 0.09                  |
| <i>Sphaerulina berberidis</i>            | 2        | 1      | 0.16                    | 0.09                  |
| <i>Taphrina wiesneri</i>                 | 2        | 1      | 0.16                    | 0.09                  |
| <i>Phoma sp.2</i>                        | 2        | 2      | 0.16                    | 0.17                  |
| <i>Parastagonospora nodorum</i>          | 2        | 0      | 0.16                    | 0.00                  |
| <i>Mrakiella sp.</i>                     | 2        | 1      | 0.16                    | 0.09                  |
| <i>Fusarium sp.</i>                      | 2        | 0      | 0.16                    | 0.00                  |
| <i>Dioszegia zsoitii</i>                 | 2        | 0      | 0.16                    | 0.00                  |
| <i>Tilletiopsis sp</i>                   | 1        | 9      | 0.08                    | 0.77                  |
| <i>Ramularia rumicicola</i>              | 1        | 2      | 0.08                    | 0.17                  |
| <i>Vishniacozyma heimaeyensis</i>        | 1        | 0      | 0.08                    | 0.00                  |
| <i>Leptosphaeria rubefaciens</i>         | 1        | 1      | 0.08                    | 0.09                  |

| Species                                   | Unwashed | Washed | % of unwashed sequences | % of washed sequences |
|-------------------------------------------|----------|--------|-------------------------|-----------------------|
| <i>Sclerostagonospora sp.</i>             | 1        | 3      | 0.08                    | 0.26                  |
| <i>Cladosporium sp.</i>                   | 1        | 2      | 0.08                    | 0.17                  |
| <i>Malassezia restricta</i>               | 1        | 1      | 0.08                    | 0.09                  |
| <i>Itersonilia pannonica</i>              | 1        | 0      | 0.08                    | 0.00                  |
| <i>Ascomycota sp.3</i>                    | 1        | 2      | 0.08                    | 0.17                  |
| <i>Bulleromyces albus</i>                 | 1        | 3      | 0.08                    | 0.26                  |
| <i>Ascomycota sp.4</i>                    | 1        | 2      | 0.08                    | 0.17                  |
| <i>Bulleribasidium variabile</i>          | 1        | 0      | 0.08                    | 0.00                  |
| <i>Loratospora luzulae</i>                | 1        | 1      | 0.08                    | 0.09                  |
| <i>Dothiora sp.</i>                       | 1        | 0      | 0.08                    | 0.00                  |
| <i>Tetracladium sp.</i>                   | 1        | 0      | 0.08                    | 0.00                  |
| <i>Phaeosphaeria sp.2</i>                 | 1        | 3      | 0.08                    | 0.26                  |
| <i>Lophodermium piceae</i>                | 1        | 3      | 0.08                    | 0.26                  |
| <i>Sarcinomyces sp.</i>                   | 1        | 1      | 0.08                    | 0.09                  |
| <i>Peniophora sp.</i>                     | 1        | 1      | 0.08                    | 0.09                  |
| <i>Malassezia globosa</i>                 | 1        | 0      | 0.08                    | 0.00                  |
| <i>Filobasidium sp.3</i>                  | 1        | 1      | 0.08                    | 0.09                  |
| <i>Curvibasidium pallidicorallinum</i>    | 1        | 2      | 0.08                    | 0.17                  |
| <i>Boeremia exigua var. pseudolilacis</i> | 1        | 2      | 0.08                    | 0.17                  |
| <i>Penicillium bialowiezense</i>          | 1        | 0      | 0.08                    | 0.00                  |
| <i>Dioszegia rishiriensis</i>             | 1        | 1      | 0.08                    | 0.09                  |
| <i>Bannozyza sp.</i>                      | 1        | 1      | 0.08                    | 0.09                  |
| <i>Phylliscum sp.</i>                     | 1        | 1      | 0.08                    | 0.09                  |
| <i>Massarina sp</i>                       | 1        | 0      | 0.08                    | 0.00                  |
| <i>Helotiales sp.2</i>                    | 1        | 0      | 0.08                    | 0.00                  |
| <i>Physcia adscendens</i>                 | 1        | 1      | 0.08                    | 0.09                  |
| <i>Parmelia sulcata</i>                   | 1        | 0      | 0.08                    | 0.00                  |
| <i>Exobasidium gracile</i>                | 0        | 1      | 0.00                    | 0.09                  |
| <i>Ascomycota sp.</i>                     | 0        | 4      | 0.00                    | 0.34                  |
| <i>Microstroma juglandis</i>              | 0        | 1      | 0.00                    | 0.09                  |
| <i>Ascomycota sp.2</i>                    | 0        | 1      | 0.00                    | 0.09                  |
| <i>Xenoramularia neerlandica2</i>         | 0        | 1      | 0.00                    | 0.09                  |
| <i>Taphrina sadebeckii</i>                | 0        | 1      | 0.00                    | 0.09                  |
| <i>Thekopsora areolata</i>                | 0        | 3      | 0.00                    | 0.26                  |
| <i>Phoma sp.</i>                          | 0        | 1      | 0.00                    | 0.09                  |
| <i>Bulleribasidium variabile</i>          | 0        | 3      | 0.00                    | 0.26                  |
| <i>Pleosporales sp2</i>                   | 0        | 1      | 0.00                    | 0.09                  |
| <i>Aureobasidium pullulans2</i>           | 0        | 2      | 0.00                    | 0.17                  |
| <i>Knufia cryptophialidica</i>            | 0        | 1      | 0.00                    | 0.09                  |

| Species                         | Unwashed | Washed | % of unwashed sequences | % of washed sequences |
|---------------------------------|----------|--------|-------------------------|-----------------------|
| <i>Gibellulopsis nigrescens</i> | 0        | 2      | 0.00                    | 0.17                  |
| <i>Rhizosphaera sp.</i>         | 0        | 3      | 0.00                    | 0.26                  |
| <i>Symmetrospora sp.</i>        | 0        | 1      | 0.00                    | 0.09                  |
| <i>Itersonilia perplexans</i>   | 0        | 1      | 0.00                    | 0.09                  |
| <i>Graphilbum sp.</i>           | 0        | 1      | 0.00                    | 0.09                  |
| <i>Resinicium bicolor</i>       | 0        | 2      | 0.00                    | 0.17                  |
| <i>Genolevuria tibetensis</i>   | 0        | 2      | 0.00                    | 0.17                  |

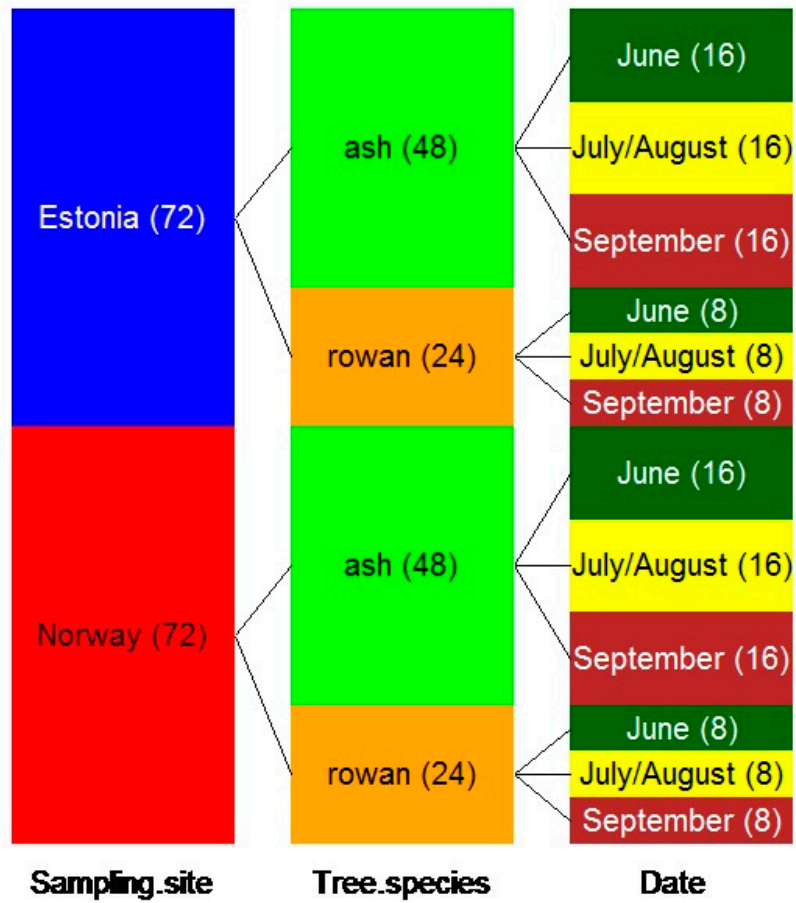

**Figure S1.** Sampling design: sampling site, tree species and sampling date – the number of samples subjected to sequencing is indicated within parenthesis

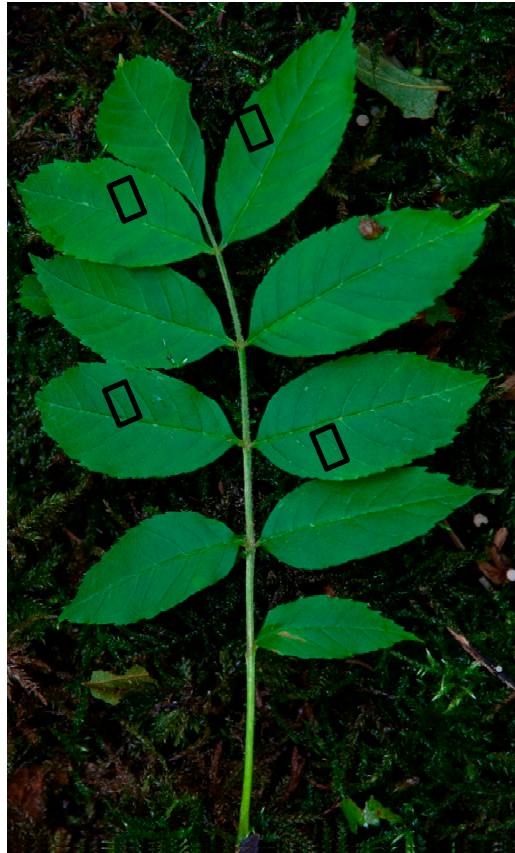

**Figure S2.** Collection of compound leaves of ash and rowan, and sampling of leaflets for DNA extraction. At both sites, compound leaves were collected across the season from selected and marked trees within each of the following groups: 1) two ash trees showing obvious signs of *H. fraxineus* infection in their shoots, 2) two ash trees without any shoot symptoms, and 3) two rowan trees. In both countries, one compound leaf per tree and time point was collected - for DNA extraction two randomly chosen leaflets pairs per compound leaf were used: in Estonia, a 1-cm<sup>2</sup> piece was taken from the sampled leaflets next to the mid-rib vein, while in Norway the entire leaflets were processed. For each of the sampled leaflet pairs, one sample was subjected to washing prior to DNA extraction and the other was processed without washing. The rectangulars on the ash leaflets show an example of how two leaflet pairs were sampled in Estonia (In Norway the corresponding entire leaflets would have been sampled)

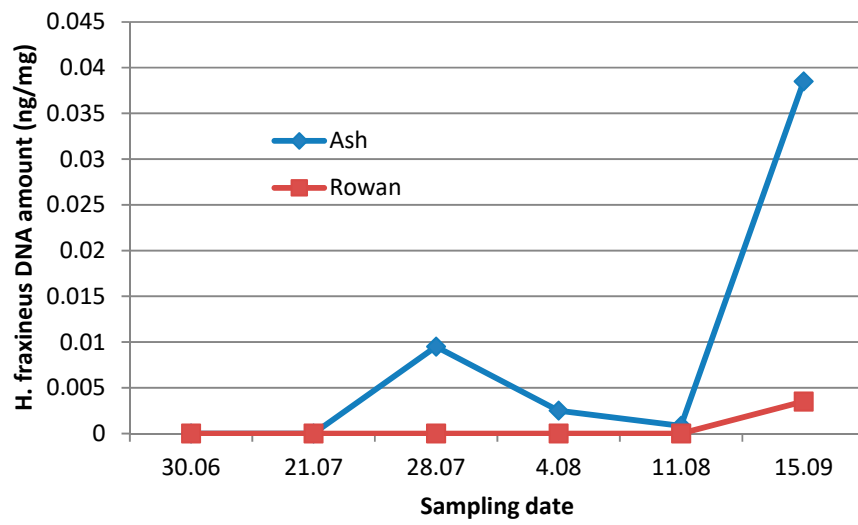

a

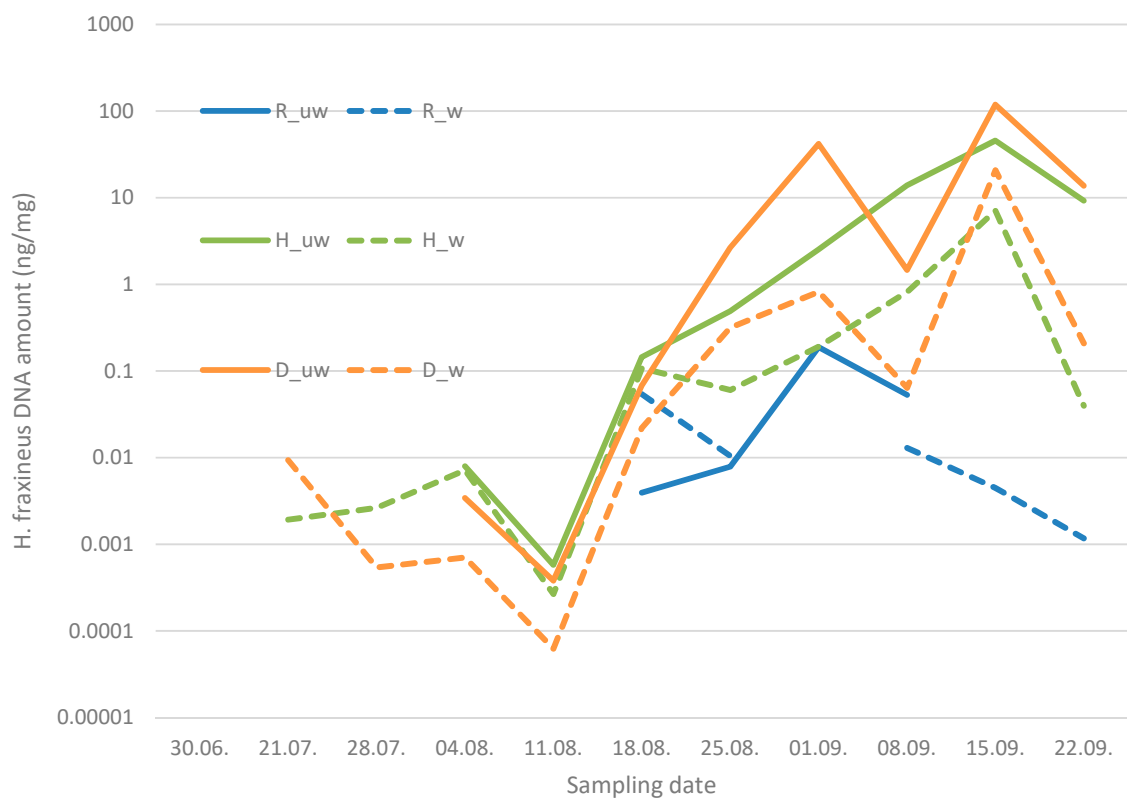

b

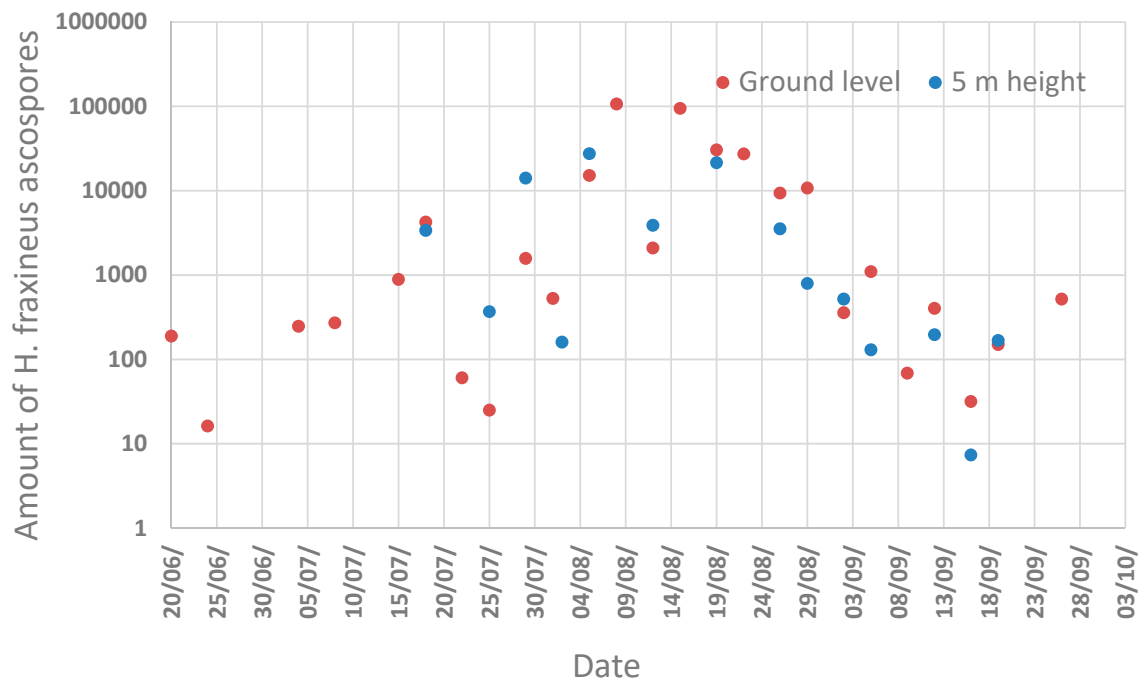

c

**Figure S3.** Amount of *Hymenoscyphus fraxineus* DNA (ng DNA/mg leaflet tissue) on ash and rowan in Estonia (a) and Norway (b) and ascospore levels of *H. fraxineus* in the Norwegian stand through the vegetation period of 2014 – data show the level of airborne pathogen ascospores from midnight to noon per day, two sampling heights (ground level and 5m above ground) were used (c). Leaf material collected in Norway: level of *H. fraxineus* DNA in unwashed (uw) and washed (w) leaflets of healthy ash (H), ash with shoot dieback symptoms (D) and rowan (R) used for qPCR screening to choose dates for sequencing. (concerning samples from the three dates subjected to sequencing (30.06., 11.08., 01.09.), n =4 per tree, phenotype and treatment for ash and n=3 per treatment for rowan, for the other dates, n=2 per per tree, phenotype and treatment. For dates with missing value, no pathogen DNA was detected. In Estonia unwashed samples of ash and rowan were used to choose the dates for sequencing (n=4 per tree, per date)

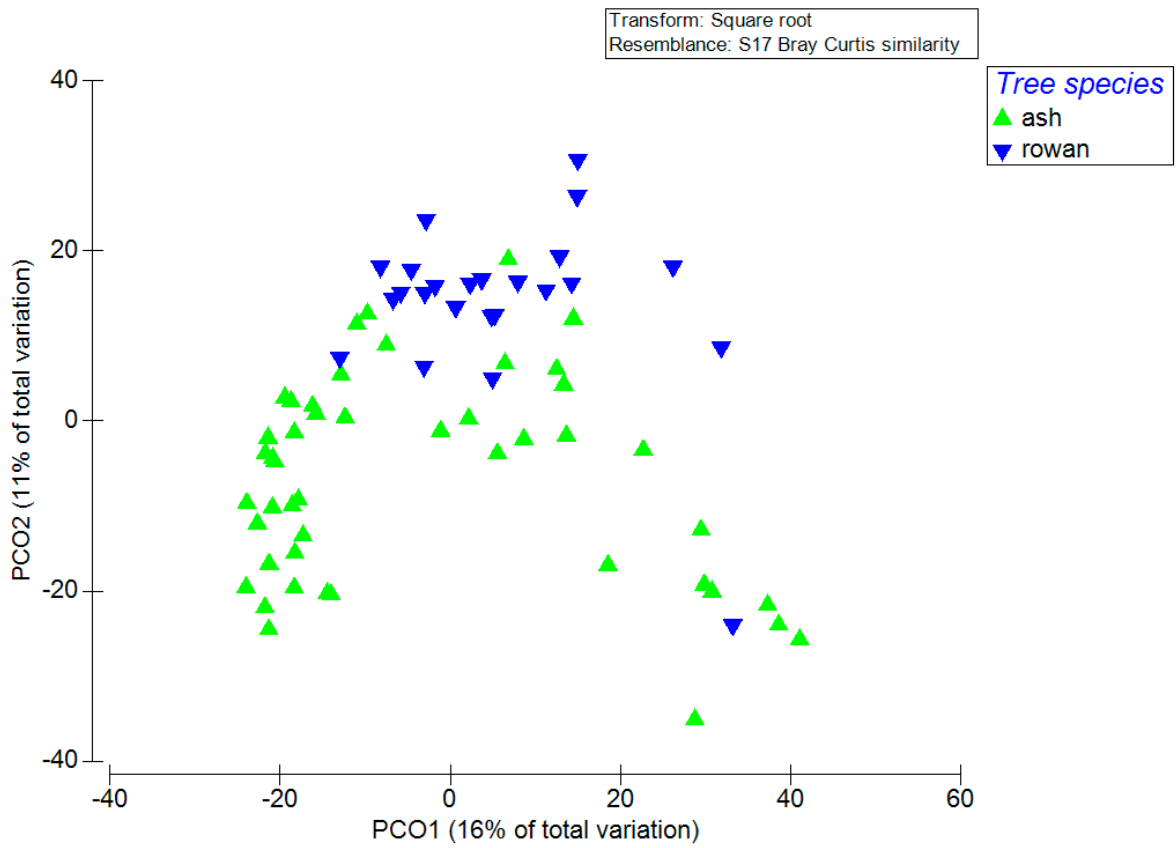

a

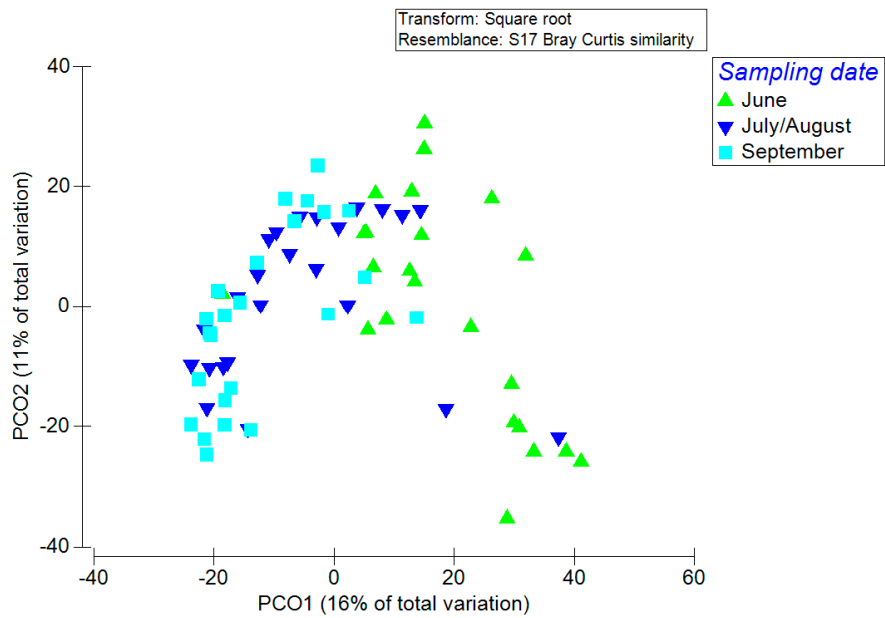

b



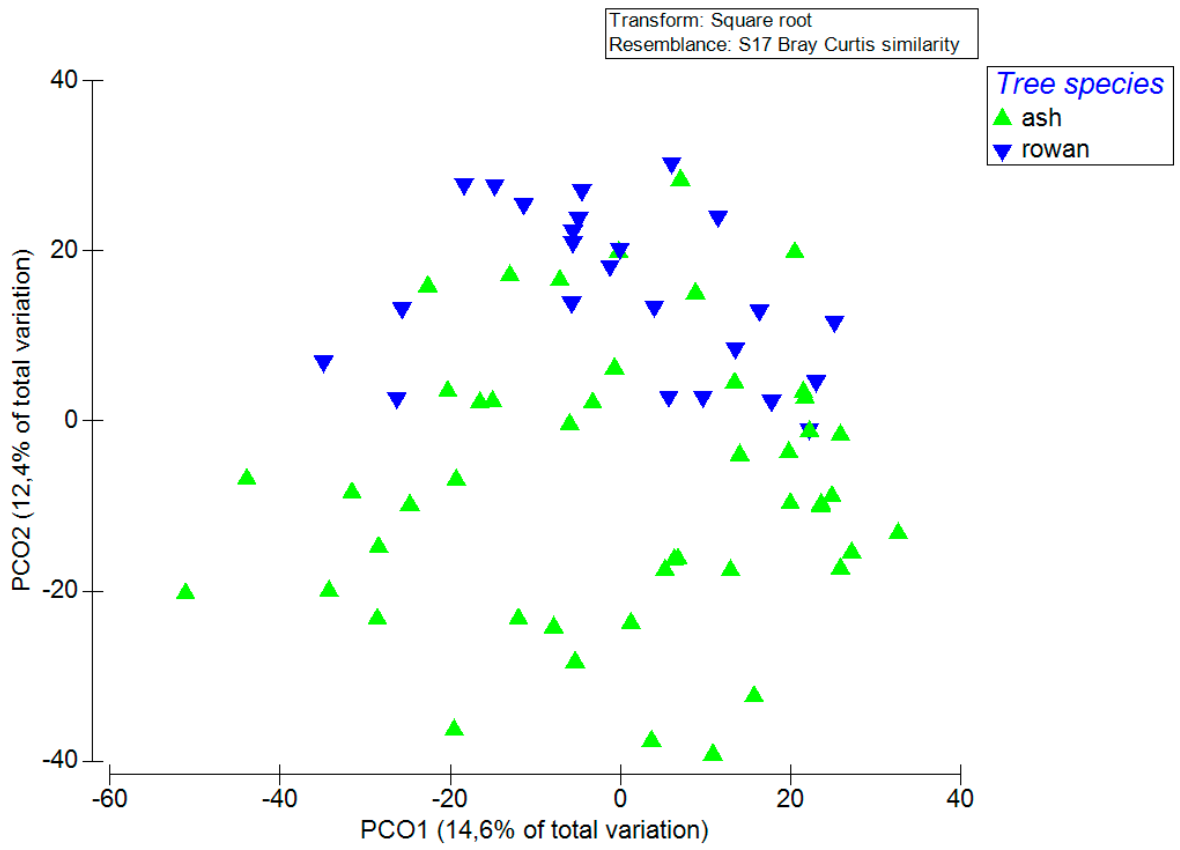

c

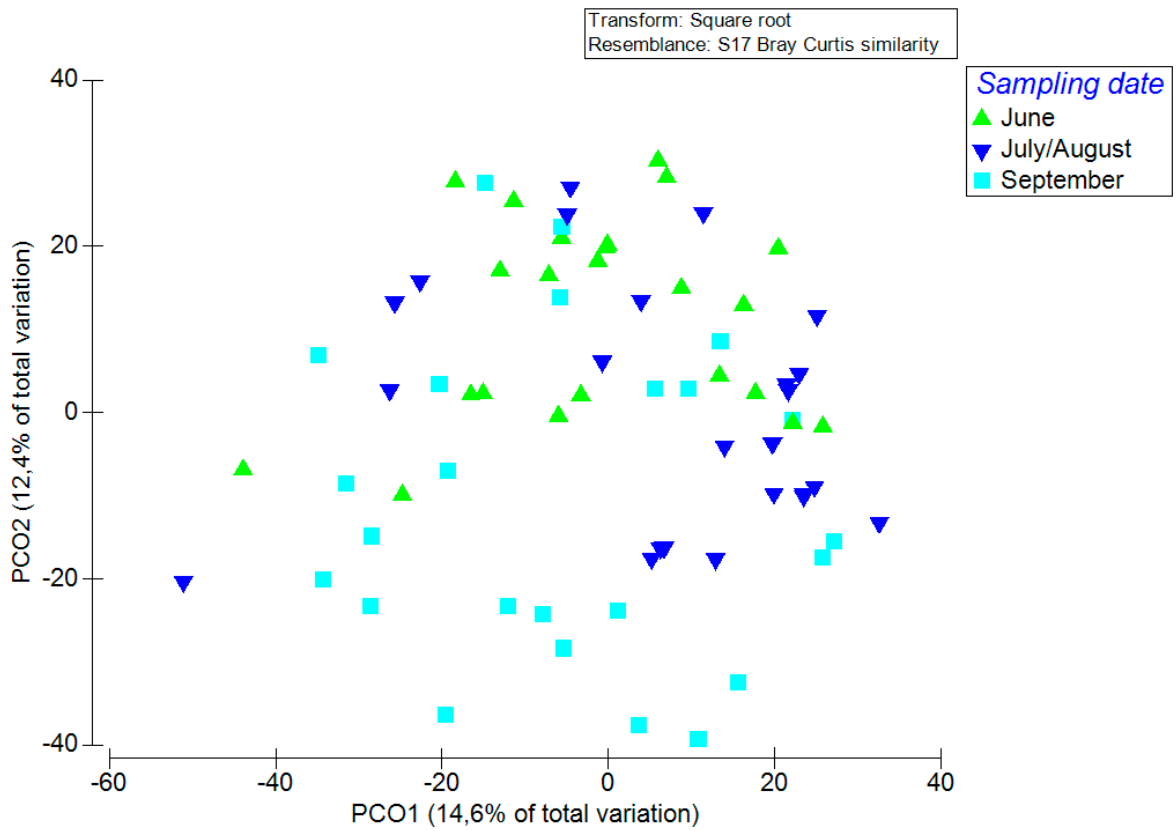

d

**Figure S4.** PCoA plots for fungal species composition between tree species and different sampling dates on the Norwegian (a and b) and Estonian site (c and d) on both ash and rowan samples

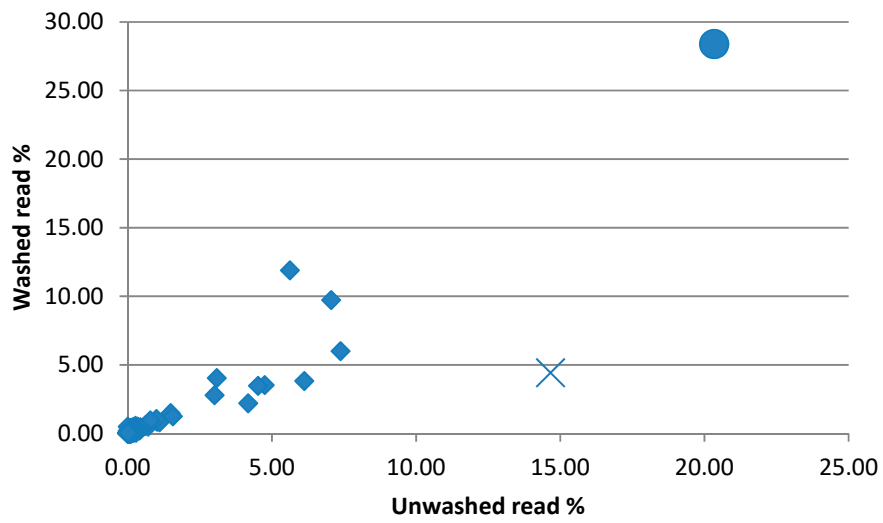

a

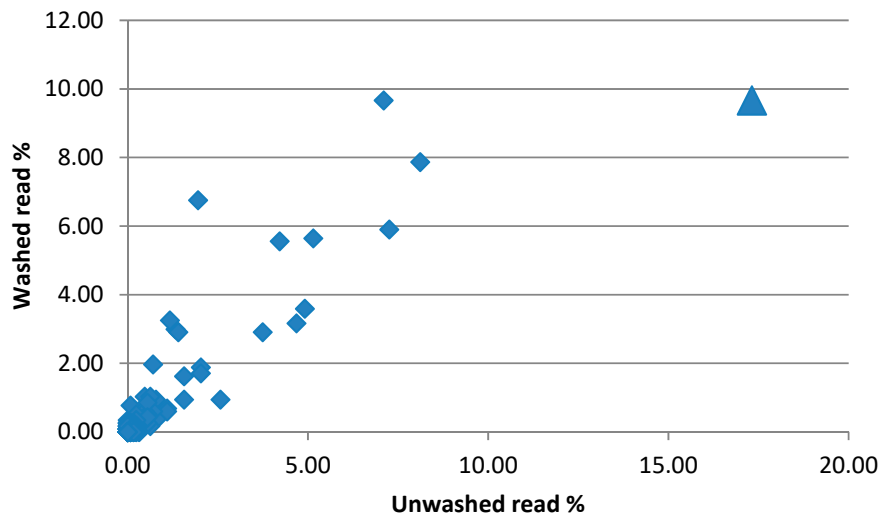

b

**Figure S5.** The sequence read % for each fungal taxon between unwashed and washed samples of *Fraxinus excelsior* (*H. fraxineus* is marked as X and *V. fraxini* as a circle; a) and the read % for each fungal taxon between unwashed and washed samples of *Sorbus aucuparia* (*Vishniacozyma victoriae* is marked as a triangle; b)

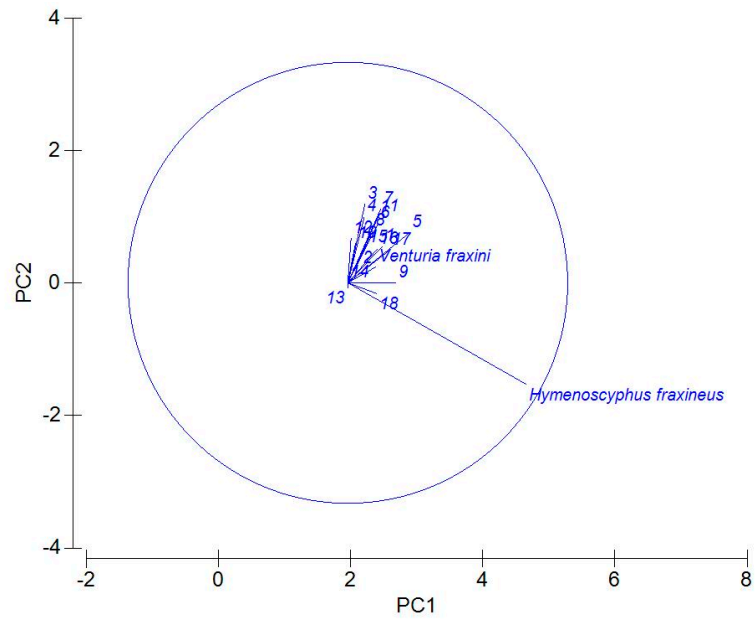

a

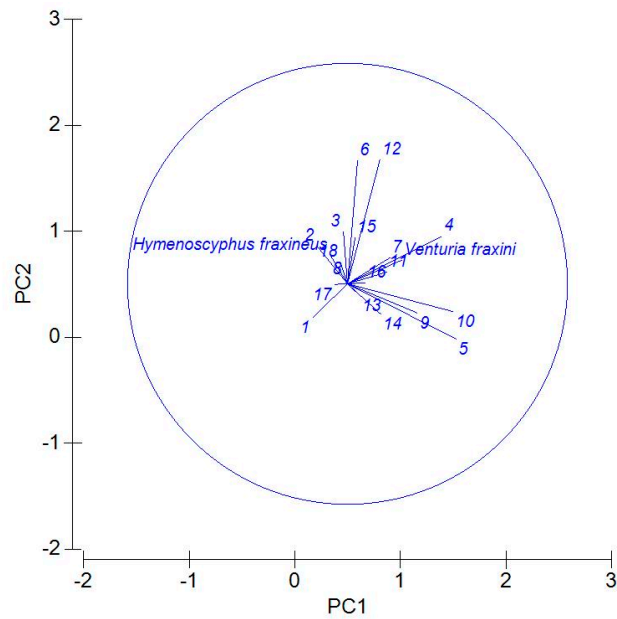

b

**Figure S6.** PCA plot of read % ratio between unwashed and washed leaflets for 20 most common species on ash (a) and rowan (b), Estonia and Norway data merged

On ash samples 1- *V. victoriae*; 2- *P. fraxini*; 3- *A. pullulans*; 4- *Dioszegia* sp.; 5- *C. ramotenellum*; 6- *T. carpini*; 7- *V. carnescens*; 8- *V. heimaeyensis*; 9- *V. foliicola*; 10- *V. wieringae*; 11- *T. padi*; 12- *D. crocea*; 13- *N. rosigena*; 14- *B. cinerea*; 15- *V. flavescens*; 16- *R. aurantiaca*; 17- *Taphrina* sp.; 18- *E. gracile*

On rowan samples 1- *V. victoriae* , 2- *A. pullulans*, 3- *Dioszegia* sp., 4- *C. ramotenellum*, 5-*T. carpini* 6-*V. carnescens*, 7-*V. heimaeyensis*, 8- *V. foliicola*, 9- *V. wieringae*, 10- *T. padi*, 11- *D. crocea*, 12- *N. rosigena*, 13- *P. flavescens*. 14- *R. aurantiaca*, 15- *A. rosarum*, 16- *Tremellales* sp., 17- Basidiomycota sp., 18- *P. sessilis*

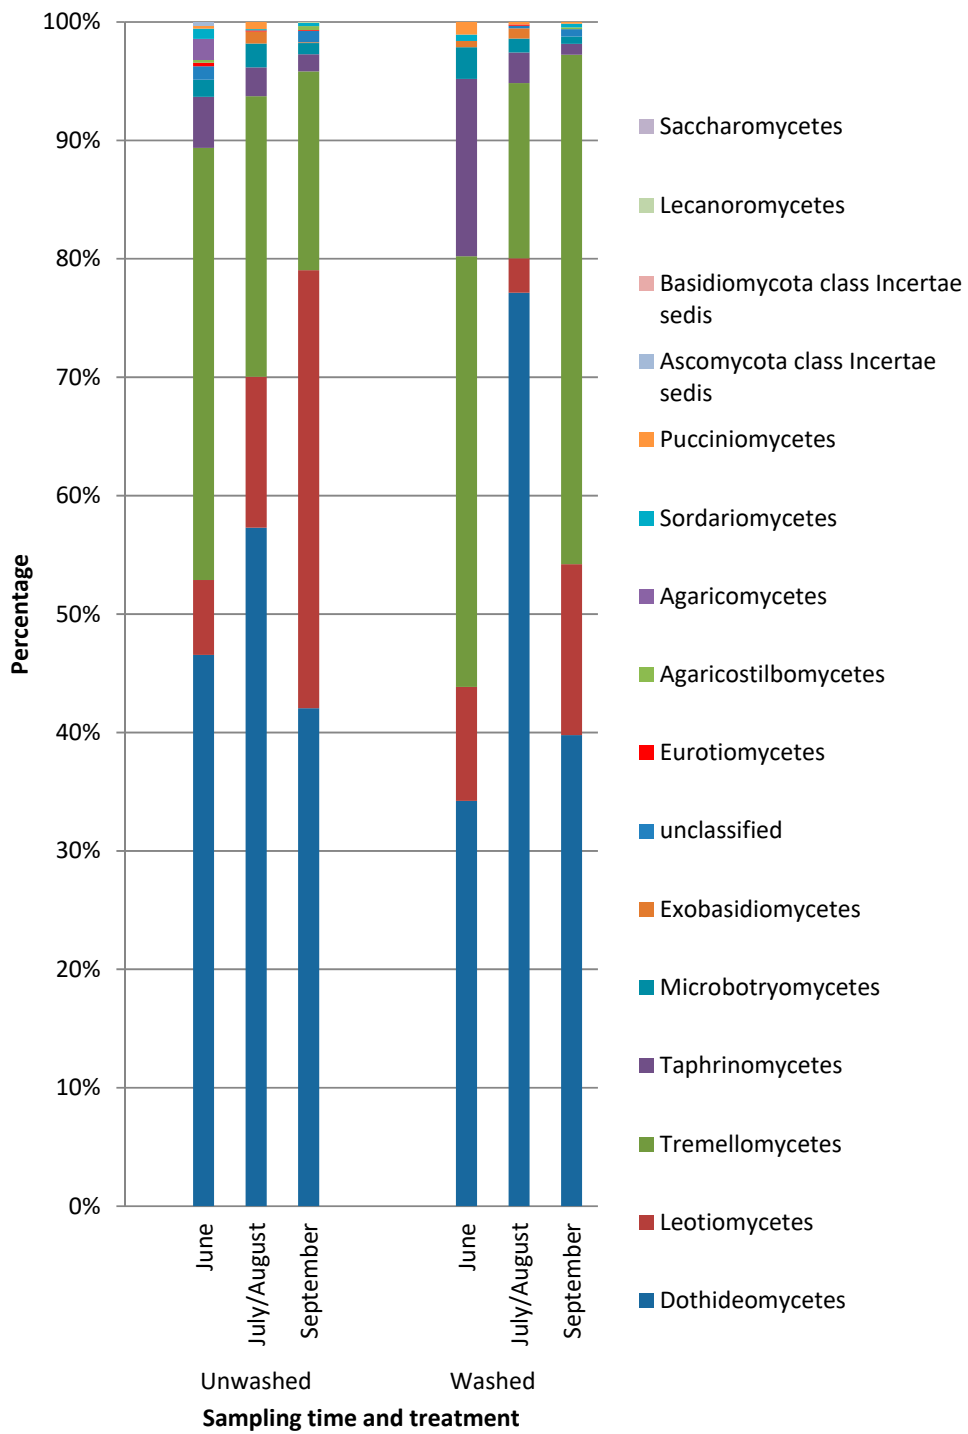

a

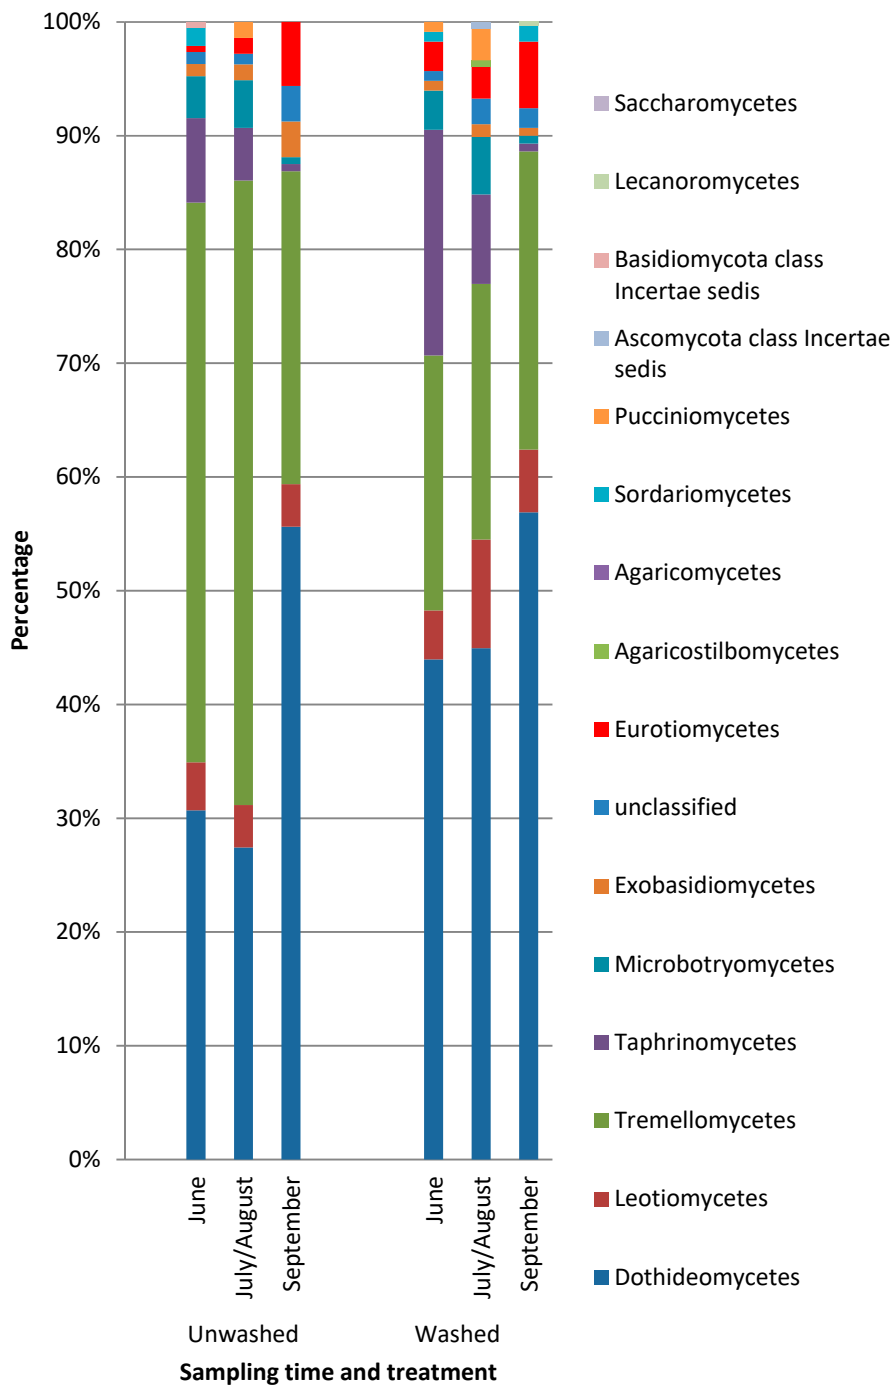

b

**Figure S7.** Across-season changes in relative proportions of fungal classes across the dataset on ash (a) and rowan (b) in Estonia

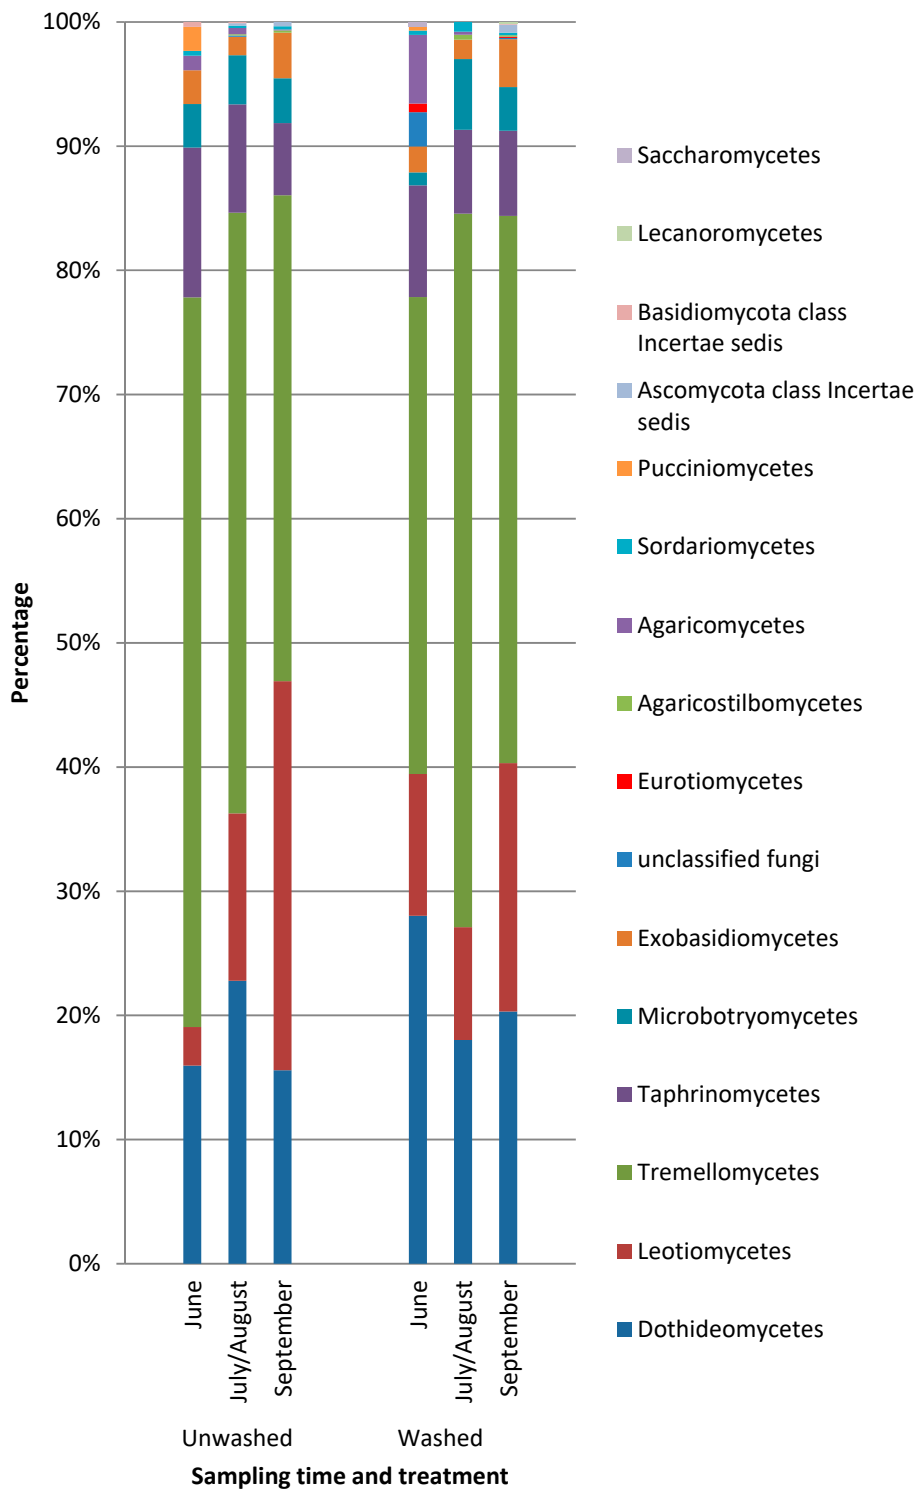



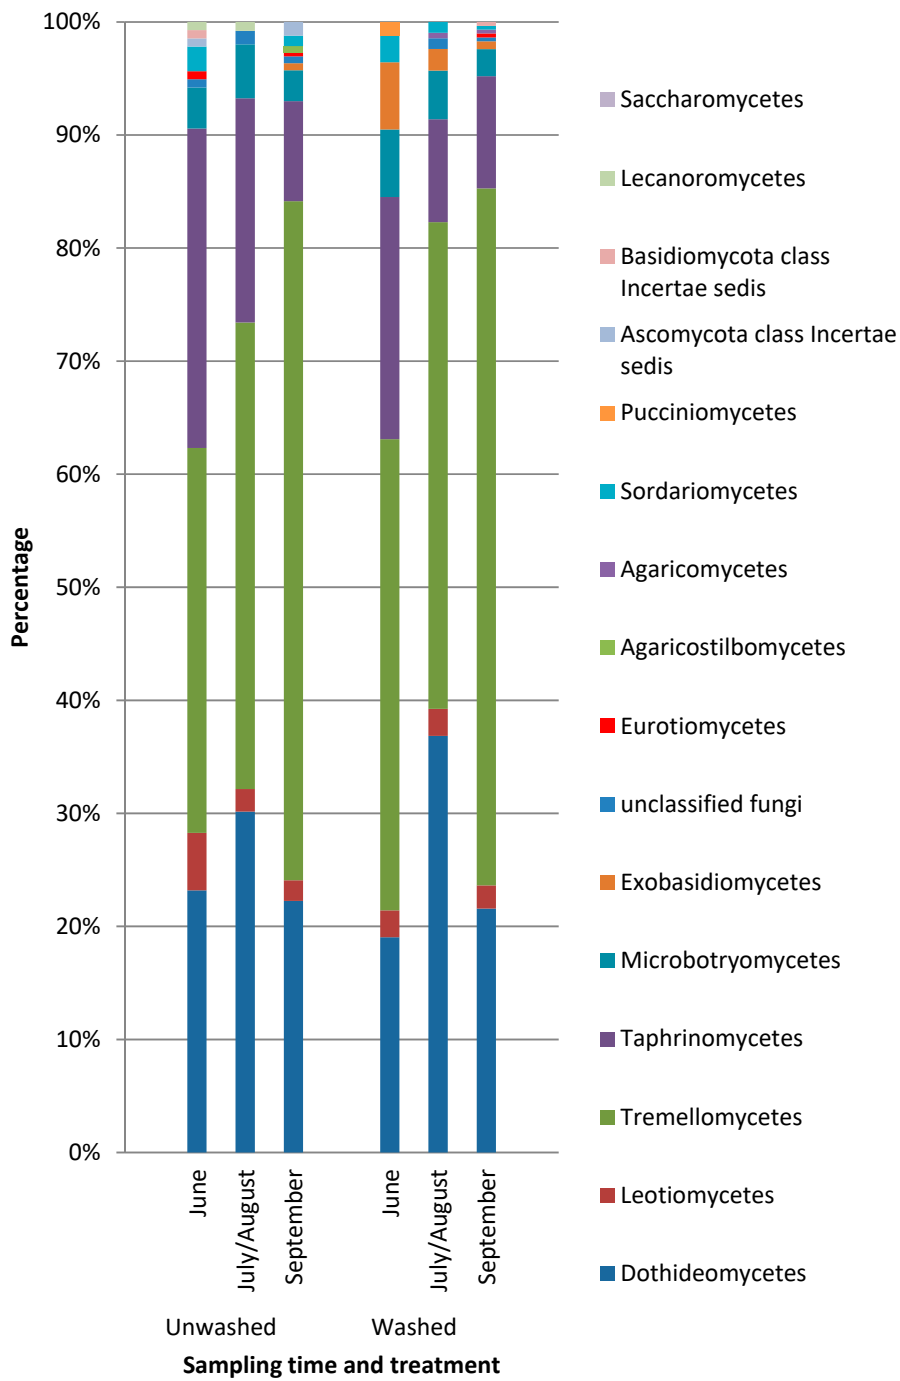

b

**Figure S8.** Across-season changes in relative proportions of fungal classes across the dataset on ash (a) and rowan (b) in Norway

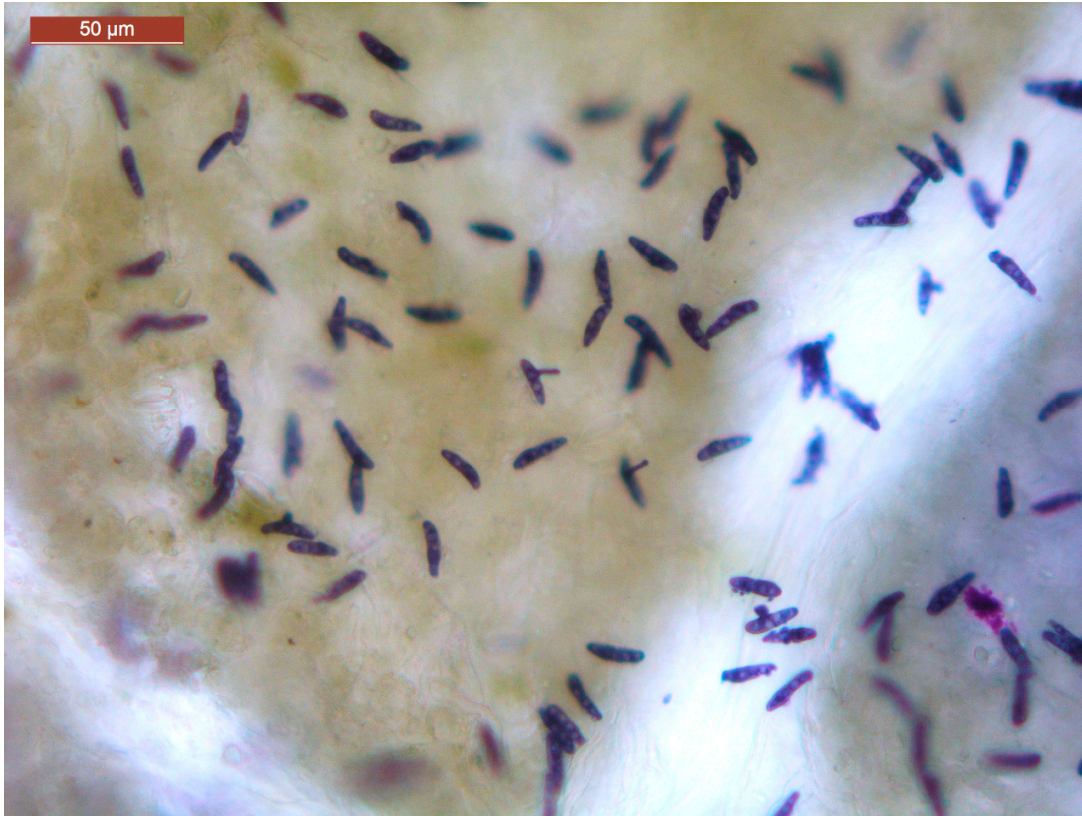

**Figure S9.** *H. fraxineus* ascospores on detached leaflet of *F. excelsior*. Photo taken 34h after ascospore deposition, note the germ tubes and appressoria-like swellings

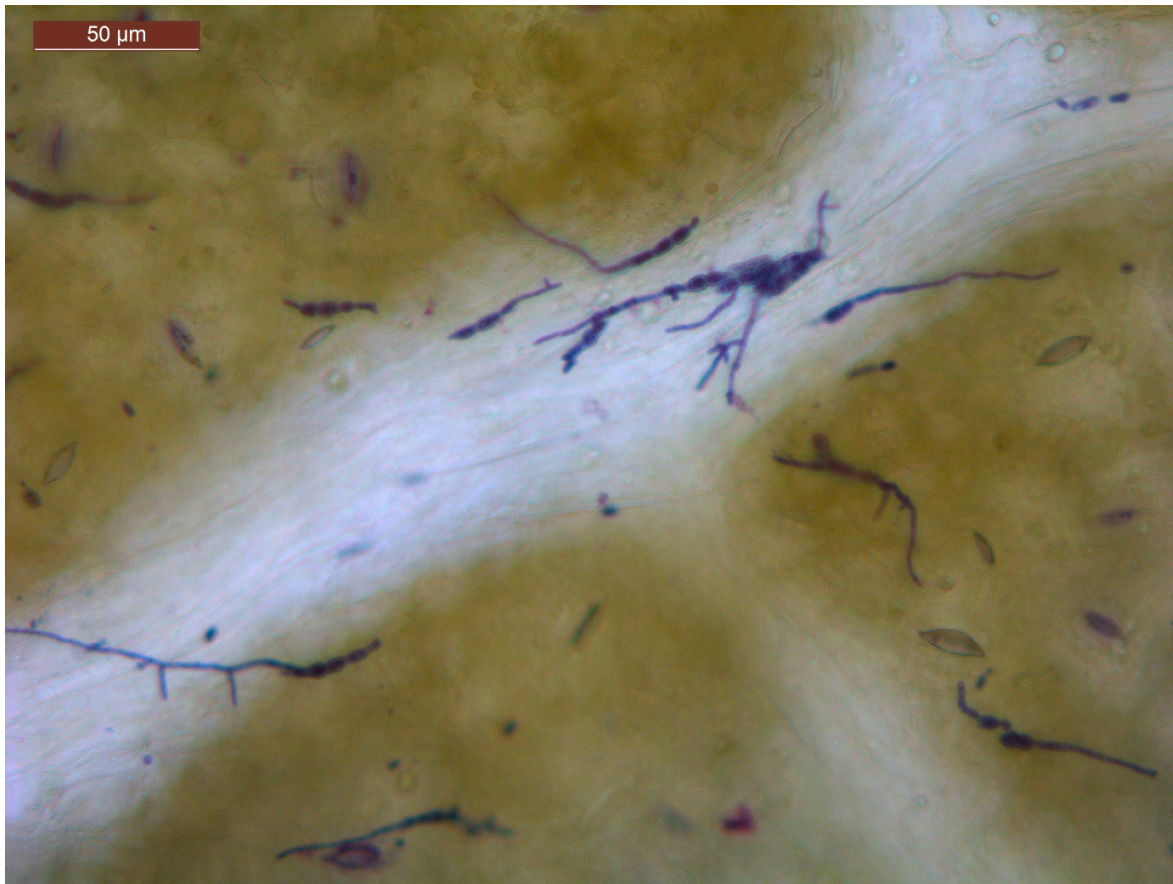

**Figure S10.** Hyphae of indigenous species growing on veinal regions of ash leaflets and showing intercalary chlamydospores
